# Supplementary material for: Cost–Effectiveness Analysis of Pharmacist Adherence Interventions in People Living with HIV/AIDS in Pakistan
Source: MDPI journal article supplement (doi:10.3390/healthcare11172453), 2023-09-01
Supplement: s1 [file s1]

## CHEERS 2022 Checklist

| Topic                                | No. | Item                                                                                                                            | Location where item is reported                                    |
|--------------------------------------|-----|---------------------------------------------------------------------------------------------------------------------------------|--------------------------------------------------------------------|
| <b>Title</b>                         |     |                                                                                                                                 |                                                                    |
|                                      | 1   | Identify the study as an economic evaluation and specify the interventions being compared.                                      | Title                                                              |
| <b>Abstract</b>                      |     |                                                                                                                                 |                                                                    |
|                                      | 2   | Provide a structured summary that highlights context, key methods, results, and alternative analyses.                           | Abstract                                                           |
| <b>Introduction</b>                  |     |                                                                                                                                 |                                                                    |
| <b>Background and objectives</b>     | 3   | Give the context for the study, the study question, and its practical relevance for decision making in policy or practice.      | Background all three paragraphs                                    |
| <b>Methods</b>                       |     |                                                                                                                                 |                                                                    |
| <b>Health economic analysis plan</b> | 4   | Indicate whether a health economic analysis plan was developed and where available.                                             | Methods:<br>Subheading; Model structure                            |
| <b>Study population</b>              | 5   | Describe characteristics of the study population (such as age range, demographics, socioeconomic, or clinical characteristics). | Methods:<br>Subheading;<br>Intervention Trial                      |
| <b>Setting and location</b>          | 6   | Provide relevant contextual information that may influence findings.                                                            | Methods:<br>Subheading;<br>Intervention Trial,<br>Model structure  |
| <b>Comparators</b>                   | 7   | Describe the interventions or strategies being compared and why chosen.                                                         | Methods:<br>Subheading; Model structure                            |
| <b>Perspective</b>                   | 8   | State the perspective(s) adopted by the study and why chosen.                                                                   | Sub heading; Model<br>Inputs and data<br>sources last two<br>lines |
| <b>Time horizon</b>                  | 9   | State the time horizon for the study and why appropriate.                                                                       | Sub heading; Model<br>Structure                                    |
| <b>Discount rate</b>                 | 10  | Report the discount rate(s) and reason chosen.                                                                                  | Sub heading; Model<br>Inputs and data<br>sources last two<br>lines |

| Topic                                                                        | No. | Item                                                                                                                                                                          | Location where item is reported                   |
|------------------------------------------------------------------------------|-----|-------------------------------------------------------------------------------------------------------------------------------------------------------------------------------|---------------------------------------------------|
| <b>Selection of outcomes</b>                                                 | 11  | Describe what outcomes were used as the measure(s) of benefit(s) and harm(s).                                                                                                 | Methods subheading; Interventional Trial          |
| <b>Measurement of outcomes</b>                                               | 12  | Describe how outcomes used to capture benefit(s) and harm(s) were measured.                                                                                                   | Methods subheading; Model structure               |
| <b>Valuation of outcomes</b>                                                 | 13  | Describe the population and methods used to measure and value outcomes.                                                                                                       | Methods subheading; Model structure               |
| <b>Measurement and valuation of resources and costs</b>                      | 14  | Describe how costs were valued.                                                                                                                                               | Methods sub heading Model Inputs and data sources |
| <b>Currency, price date, and conversion</b>                                  | 15  | Report the dates of the estimated resource quantities and unit costs, plus the currency and year of conversion.                                                               | Methods sub heading Model Inputs and data sources |
| <b>Rationale and description of model</b>                                    | 16  | If modelling is used, describe in detail and why used. Report if the model is publicly available and where it can be accessed.                                                | Model structure                                   |
| <b>Analytics and assumptions</b>                                             | 17  | Describe any methods for analysing or statistically transforming data, any extrapolation methods, and approaches for validating any model used.                               | Methods: Statistical analysis                     |
| <b>Characterising heterogeneity</b>                                          | 18  | Describe any methods used for estimating how the results of the study vary for subgroups.                                                                                     | sensitivity analysis                              |
| <b>Characterising distributional effects</b>                                 | 19  | Describe how impacts are distributed across different individuals or adjustments made to reflect priority populations.                                                        | Methods, Last paragraph                           |
| <b>Characterising uncertainty</b>                                            | 20  | Describe methods to characterise any sources of uncertainty in the analysis.                                                                                                  | Methods, Last paragraph                           |
| <b>Approach to engagement with patients and others affected by the study</b> | 21  | Describe any approaches to engage patients or service recipients, the general public, communities, or stakeholders (such as clinicians or payers) in the design of the study. | Not applicable                                    |
| <b>Results</b>                                                               |     |                                                                                                                                                                               |                                                   |
| <b>Study parameters</b>                                                      | 22  | Report all analytic inputs (such as values, ranges, references) including uncertainty or distributional assumptions.                                                          | Results, first paragraph figures and Tables       |

| Topic                                                                       | No. | Item                                                                                                                                                                     | Location where item is reported |
|-----------------------------------------------------------------------------|-----|--------------------------------------------------------------------------------------------------------------------------------------------------------------------------|---------------------------------|
| <b>Summary of main results</b>                                              | 23  | Report the mean values for the main categories of costs and outcomes of interest and summarise them in the most appropriate overall measure.                             | Results, second paragraph       |
| <b>Effect of uncertainty</b>                                                | 24  | Describe how uncertainty about analytic judgments, inputs, or projections affect findings. Report the effect of choice of discount rate and time horizon, if applicable. | Results, third paragraph        |
| <b>Effect of engagement with patients and others affected by the study</b>  | 25  | Report on any difference patient/service recipient, general public, community, or stakeholder involvement made to the approach or findings of the study                  | Not reported                    |
| <b>Discussion</b>                                                           |     |                                                                                                                                                                          |                                 |
| <b>Study findings, limitations, generalisability, and current knowledge</b> | 26  | Report key findings, limitations, ethical or equity considerations not captured, and how these could affect patients, policy, or practice.                               | Discussion                      |
| <b>Other relevant information</b>                                           |     |                                                                                                                                                                          |                                 |
| <b>Source of funding</b>                                                    | 27  | Describe how the study was funded and any role of the funder in the identification, design, conduct, and reporting of the analysis                                       | End of manuscript               |
| <b>Conflicts of interest</b>                                                | 28  | Report authors conflicts of interest according to journal or International Committee of Medical Journal Editors requirements.                                            | End of manuscript               |

*From:* Husereau D, Drummond M, Augustovski F, et al. Consolidated Health Economic Evaluation Reporting Standards 2022 (CHEERS 2022) Explanation and Elaboration: A Report of the ISPOR CHEERS II Good Practices Task Force. Value Health 2022;25. [doi:10.1016/j.jval.2021.10.008](https://doi.org/10.1016/j.jval.2021.10.008)
